# Supplementary material
Source: publisher figshare collection journal article supplement (https://adisjournals.figshare.com/articles/dataset/_/23925021)
Supplement: Supplementary file 1 [file 2]

BASELINE DEMOGRAPHICS, COMORBIDITIES, TREATMENT PATTERNS AND BURDEN OF ATOPIC DERMATITIS IN ADULTS AND ADOLESCENTS FROM THE GLOBOSTAD LONG-TERM OBSERVATIONAL STUDY

OBJECTIVE

**GLOBOSTAD** aimed to characterize patients who receive **dupilumab** for **moderate-to-severe atopic dermatitis (AD)** in a **real-world** setting.

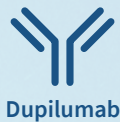

PATIENTS

PATIENTS ENROLLED

AD SEVERITY AT BASELINE, MEAN

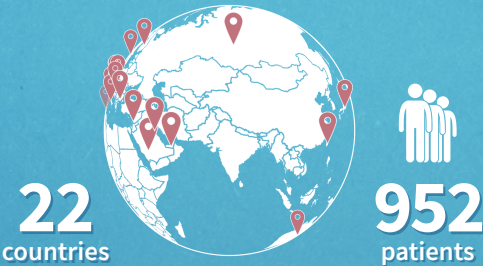

|        |    |           |
|--------|----|-----------|
| BSA    | 45 | (n = 852) |
| EASI   | 25 | (n = 846) |
| SCORAD | 61 | (n = 851) |
| DLQI   | 14 | (n = 589) |
| POEM   | 20 | (n = 775) |

COMORBIDITIES

PATIENTS WITH ONE OR MORE TYPE 2 INFLAMMATORY COMORBIDITY AT BASELINE

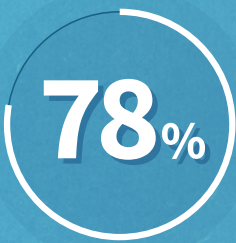

Allergic rhinitis

52%

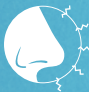

Asthma

34%

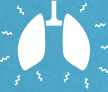

Food allergy

31%

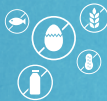

Other allergies

29%

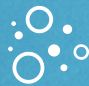

TREATMENTS

AD TREATMENTS THE YEAR BEFORE ENROLLMENT

33%

Systemic non-steroidal immunosuppressants

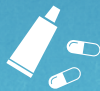

18%

Systemic corticosteroids

REASONS FOR DUPILUMAB INITIATION

|                            |       |
|----------------------------|-------|
| Previous treatment failure | 74.9% |
| Disease exacerbation       | 16.1% |
| Maintenance treatment      | 8.8%  |
| Other                      | 0.2%  |

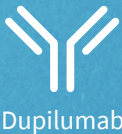

CONCLUSION

Patients enrolled in **GLOBOSTAD** demonstrated a **multidimensional burden of disease**, despite previous use of systemic and non-systemic **AD treatments**.

Piergiacomo Calzavara-Pinton · Jarmila Čelakovská · Hilde Lapeere · Gregor Holzer · Mona Al-Ahmad · Chia-Yu Chu · Silvia M. Ferrucci · Yoko Kataoka · Mariateresa Rossi · Daria S. Fomina · Wen-Hung Chung · Thrasyvoulos Tzellos · Anne-Claire Fougousse · Jiangming Wu · Marius Ardeleanu · Zafer E. Ozturk

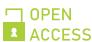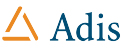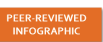

The graphical abstract represents the opinions of the authors. For a full list of declarations, including funding and author disclosure statements, please see the full text online. © The authors, CC-BY-NC 2023.
